# Supplementary material for: Dietary patterns, uric acid levels, and hyperuricemia: a systematic review and meta-analysis
Source: Royal Society of Chemistry journal article supplement (doi:10.1039/d3fo02004e), 2023-01-01
Supplement: d3fo02004e1.pdf [file d3fo02004e1.pdf]

## Supplemental materials

### Dietary Patterns, Uric Acid Levels, and Hyperuricemia: A Systematic Review and Meta-Analysis

#### Catalogue

|                                                                                                                                                                                     |            |
|-------------------------------------------------------------------------------------------------------------------------------------------------------------------------------------|------------|
| <b>Table S1</b> Results of literature search.....                                                                                                                                   | <b>P2</b>  |
| <b>Table S2</b> Dietary patterns, categories, and constituent foods from 41 studies included in the meta-analysis. ....                                                             | <b>P3</b>  |
| <b>Table S3</b> Quality assessment: cross-sectional studies. ....                                                                                                                   | <b>P11</b> |
| <b>Table S4</b> Quality assessment: cohort studies and case-control studies. ....                                                                                                   | <b>P13</b> |
| <b>Table S5</b> Subgroup analysis for the association between dietary patterns and hyperuricemia. ...                                                                               | <b>P14</b> |
| <b>Table S6</b> Publication bias of included articles. ....                                                                                                                         | <b>P16</b> |
| <b>Figure S1</b> Assessment risk of bias of non-randomized studies. ....                                                                                                            | <b>P17</b> |
| <b>Figure S2</b> Assessment risk of bias of randomized controlled trials. ....                                                                                                      | <b>P18</b> |
| <b>Figure S3</b> Forest plot of plant-based dietary pattern and SUA. ....                                                                                                           | <b>P19</b> |
| <b>Figure S4</b> Forest plot of animal-based dietary pattern and SUA. ....                                                                                                          | <b>P20</b> |
| <b>Figure S5</b> Forest plot of mixed dietary pattern and SUA. ....                                                                                                                 | <b>P21</b> |
| <b>Figure S6</b> Funnel plot for the association between animal-based dietary pattern and SUA (effect value: mean difference) . ....                                                | <b>P22</b> |
| <b>Figure S7</b> Funnel plot for the association between dietary patterns and SUA (effect value: coefficient). ....                                                                 | <b>P23</b> |
| <b>Figure S8</b> Funnel plot for the association between dietary patterns and hyperuricemia (effect value: odds ratio). ....                                                        | <b>P24</b> |
| <b>Figure S9</b> Influence analysis for the association between animal-based dietary pattern and SUA (effect value: mean difference) ....                                           | <b>P25</b> |
| <b>Figure S10</b> Influence analysis for the association between dietary patterns and SUA (effect value: coefficient). ....                                                         | <b>P26</b> |
| <b>Figure S11</b> Influence analysis for the association between dietary patterns and hyperuricemia (effect value: odds ratio). ....                                                | <b>P27</b> |
| <b>Figure S12</b> Influence analysis for the association between plant-based dietary pattern and SUA (effect value: mean difference). ....                                          | <b>P28</b> |
| <b>Figure S13</b> Forest plot of plant-based dietary pattern and SUA in cross-sectional studies (excluded studies of Pilar Guallar-Castillón et al. and Ahmad Syauqy et al). . .... | <b>P29</b> |

**Table S1** Results of literature search.

| Database       | Date of search | Query formulation                                                                                                                                                                                                                                                                                                                                                       | Number of literature detected |
|----------------|----------------|-------------------------------------------------------------------------------------------------------------------------------------------------------------------------------------------------------------------------------------------------------------------------------------------------------------------------------------------------------------------------|-------------------------------|
| PubMed         | March 15, 2023 | ((((dietary pattern*) OR (eating pattern*) OR (food pattern*) OR (diet pattern*) OR (nutrient pattern*) OR (diet*) OR (diet index) OR (diet score) OR (dietary) OR (dietary intake) OR (dietary score) OR (dietary index) OR (dietary type*) OR (dietary habit*) OR (dietary approaches*)) AND ((hyperuricemia) OR (serum uric acid) OR (uric acid) OR (Serum Urate)))) | 5850                          |
| Web of Science | March 15, 2023 | ((((dietary pattern*) OR (eating pattern*) OR (food pattern*) OR (diet pattern*) OR (nutrient pattern*) OR (diet*) OR (diet index) OR (diet score) OR (dietary) OR (dietary intake) OR (dietary score) OR (dietary index) OR (dietary type*) OR (dietary habit*) OR (dietary approaches*)) AND ((hyperuricemia) OR (serum uric acid) OR (uric acid) OR (Serum Urate)))) | 9036                          |
| Embase         | March 15, 2023 | ((((dietary pattern*) OR (eating pattern*) OR (food pattern*) OR (diet pattern*) OR (nutrient pattern*) OR (diet*) OR (diet index) OR (diet score) OR (dietary) OR (dietary intake) OR (dietary score) OR (dietary index) OR (dietary type*) OR (dietary habit*) OR (dietary approaches*)) AND ((hyperuricemia) OR (serum uric acid) OR (uric acid) OR (Serum Urate)))) | 13362                         |

**Table S2** Dietary patterns, categories, and constituent foods from 41 studies included in the meta-analysis.

| Author                         | Location | Year | Dietary pattern                        | Constituent foods                                                                                                                                                                                                        | Categories   |
|--------------------------------|----------|------|----------------------------------------|--------------------------------------------------------------------------------------------------------------------------------------------------------------------------------------------------------------------------|--------------|
| Meiqi Zhou et al. (1) [8]      | China    | 2022 | Plant-based dietary pattern            | High intake of fresh vegetables, fruits, dairy products, eggs, and legumes and their products                                                                                                                            | Plant-based  |
|                                |          |      | Animal dietary pattern                 | High intake of poultry, livestock, fish and shrimp, processed meat and nuts                                                                                                                                              | Animal-based |
|                                |          |      | RRR dietary pattern                    | High intake of poultry, sugary beverages, and animal organs and the low intake of desserts and snacks                                                                                                                    | Mixed        |
|                                |          |      | PLS diet                               | Poultry, Animal organs, Sugary beverages, Tea or coffee, Meat, Legumes and their products, Fresh vegetables, Preserved vegetables                                                                                        | Animal-based |
|                                |          |      | Processed food diet                    | Mushrooms and algae, Preserved vegetables, Snacks and dessert, Processed meats                                                                                                                                           | Mixed        |
| Tingjing Zhang et al. [36]     | China    | 2022 | Vegetable                              | High intake of celery, cucumber, Chinese cabbage, green leafy vegetables, pumpkin, and carrot                                                                                                                            | Plant-based  |
|                                |          |      | Sweet food                             | Strawberry, kiwi fruit, persimmon, grape, pineapple, Western-style pastry, cakes, sweets, and candied fruits                                                                                                             | Mixed        |
|                                |          |      | Animal food patterns                   | High consumption of animal organs, animal blood, animal liver, preserved eggs and sausage                                                                                                                                | Animal-based |
| Meilin Zhang et al. [20]       | China    | 2012 | Animal products and fried food pattern | High in pork, eggs, animal giblets, poultry and fried wheat products while low in vegetables and fruits                                                                                                                  | Animal-based |
|                                |          |      | Western pattern                        | High in beef, lamb, cake, and beverages, including juice and alcoholic beverages                                                                                                                                         | Animal-based |
|                                |          |      | Soybean products and fruit pattern     | High in soybean products, fruits, vegetables and starchy tubers                                                                                                                                                          | Plant-based  |
| Marta Guasch-Ferré et al. [15] | Spain    | 2013 | Mediterranean Diet                     | High consumption of fruits, vegetables, legumes, olive oil, nuts, and whole grain; a moderate consumption of wine, dairy products, and poultry; and a low consumption of red meat, sweet beverages, creams, and pastries | Plant-based  |
| Yuxiang Yang et al. [51]       | China    | 2022 | Typical Chinese                        | Wheat, coarse grain, fried staple, tuber                                                                                                                                                                                 | Plant-based  |
|                                |          |      | Modern Chinese                         | Bacteria, legume and product, mixed beans, fresh vegetable, fresh fruit, dry fruit, aquatic product, coarse grain, dairy and product, fresh egg, nuts and seeds                                                          | Plant-based  |

|                           |       |      |                                 |                                                                                                                            |              |
|---------------------------|-------|------|---------------------------------|----------------------------------------------------------------------------------------------------------------------------|--------------|
|                           |       |      | Western                         | Western staples, snack, soft beverage, dairy and product, nuts and seeds, processed meat, fresh egg, dry fruit             | Mixed        |
|                           |       |      | Animal products and alcohol     | Organ, red meat, alcohol, poultry, fried staple, processed egg, aquatic product, processed meat                            | Animal-based |
|                           |       |      | Tuber and fermented vegetables  | Fermented vegetable, tuber, animal fat, dry vegetable, mixed beans, snack                                                  | Plant-based  |
| Yang Xia et al. [18]      | China | 2018 | Vegetable dietary pattern       | Vegetables, soy products, coarse cereals                                                                                   | Plant-based  |
|                           |       |      | Sweet pattern                   | Candied fruits, cakes, ice cream                                                                                           | Mixed        |
|                           |       |      | Animal foods dietary pattern    | Animal organ, seafood, processed meat products                                                                             | Animal-based |
| Zumin Shi et al. [37]     | China | 2020 | Traditional southern pattern    | Rice, pork and vegetable, inverse loadings for wheat flour and whole grain                                                 | Mixed        |
|                           |       |      | Modern dietary pattern          | Fruit, soy milk, eggs, milk, deep fried products, fast food and cakes, inverse loadings for rice and salted vegetables     | Mixed        |
| Xirun Liu et al. (1) [21] | China | 2020 | HUA-related dietary pattern     | Higher intake of fish, fresh meat, wine, sugary drinks, cured bacon, wheat products and less intake of vegetables and milk | Animal-based |
|                           |       |      | Mixed food pattern              | Intake of fish, vegetables, eggs, animal viscera, fresh meat, cereals and potatoes                                         | Animal-based |
|                           |       |      | Meat and wine pattern           | Intake of cured bacon, wine, algae, nuts, fish, beans                                                                      | Mixed        |
|                           |       |      | Fruit and vegetable pattern     | High intake of fruits, vegetables, rice noodles, cured bacon and less fresh meat                                           | Plant-based  |
|                           |       |      | Vegetable and fish meat pattern | Intake of fish, vegetables, algae, animal viscera, wheat products                                                          | Mixed        |
|                           |       |      | Mixed food pattern              | legumes, algae, vegetables, fruits, fresh meat, sugary drinks, milk, nuts                                                  | Plant-based  |
|                           |       |      | Vegetable and staple pattern    | Intake of vegetables, cereals and potatoes, rice and noodles, algae, cured bacon, milk                                     | Plant-based  |
| Xirun Liu et al. (2) [52] | China | 2018 | Animal products pattern         | Fish, animal giblets, fresh meat, wheat products                                                                           | Animal-based |
|                           |       |      | Plant-based pattern             | Vegetables, fruits, mushroom, algae food, legumes, nuts, brawn, and bacon                                                  | Plant-based  |
|                           |       |      | Mixed food                      | Rice, cereal, tubers, snack, dessert, eggs, and animal giblets                                                             | Mixed        |

|                                     |               |      |                               |                                                                                                                                                                                                                          |              |
|-------------------------------------|---------------|------|-------------------------------|--------------------------------------------------------------------------------------------------------------------------------------------------------------------------------------------------------------------------|--------------|
| Shaokai Lin et al. [9]              | China         | 2018 | Meat pattern                  | Livestock, other meats and dairy products                                                                                                                                                                                | Animal-based |
|                                     |               |      | Coastal pattern               | Aquatic products and alcoholic drinks                                                                                                                                                                                    | Mixed        |
|                                     |               |      | Traditional pattern           | Cereals, pork and vegetables                                                                                                                                                                                             | Mixed        |
|                                     |               |      | High-quality protein pattern  | Soy and its products, eggs                                                                                                                                                                                               | Mixed        |
| Fang He et al. [53]                 | China         | 2017 | Traditional Chinese pattern   | High intake of rice and rice products, coarse grains, starchy tubers, vegetables, pickled vegetables, pork, soybean and soybean products, and tea                                                                        | Plant-based  |
|                                     |               |      | Meat food pattern             | High intakes of poultry, beef/mutton, processed and cooked meat, eggs, fats/oil, snacks and fast food, milk and dairy, cake and biscuits, and soft drinks                                                                | Animal-based |
|                                     |               |      | Mixed food patterns           | High intakes of wheat and wheat products, vegetables, mushroom, fresh fruits, pork, fish and shrimps, seafood, and caffeinated beverages                                                                                 | Plant-based  |
| Yun Gao et al. [54]                 | China         | 2021 | DASH                          | Higher intakes of vegetables, fruits or 18 grains and lower intake of fat or sweetened beverages                                                                                                                         | Plant-based  |
| Kontogianni, M. D. et al. [42]      | Korean        | 2012 | Mediterranean diet            | High consumption of fruits, vegetables, legumes, olive oil, nuts, and whole grain; a moderate consumption of wine, dairy products, and poultry; and a low consumption of red meat, sweet beverages, creams, and pastries | Plant-based  |
| Christina Chrysohoou et al. [41]    | Ikaria Island | 2011 | Mediterranean diet            | High consumption of fruits, vegetables, legumes, olive oil, nuts, and whole grain; a moderate consumption of wine, dairy products, and poultry; and a low consumption of red meat, sweet beverages, creams, and pastries | Plant-based  |
| L. Bekkouche et al. [16]            | Algeria       | 2014 | Mediterranean Diet            | High consumption of fruits, vegetables, legumes, olive oil, nuts, and whole grain; a moderate consumption of wine, dairy products, and poultry; and a low consumption of red meat, sweet beverages, creams, and pastries | Plant-based  |
| Stephen P Juraschek et al. (1) [60] | America       | 2018 | Fruit and Vegetable-rich diet | A fruit and vegetable (FV)-rich diet but otherwise similar to typical American diet                                                                                                                                      | Plant-based  |
|                                     |               |      | DASH                          | Higher intakes of vegetables, fruits or 18 grains and lower intake of fat or sweetened beverages                                                                                                                         | Plant-based  |

|                                      |                 |      |                                         |                                                                                                                                                                                                                          |              |
|--------------------------------------|-----------------|------|-----------------------------------------|--------------------------------------------------------------------------------------------------------------------------------------------------------------------------------------------------------------------------|--------------|
|                                      |                 |      | Typical American diet                   | Low in fruits, vegetables, and dairy products, with a fat content typical of the average diet in the United States.                                                                                                      | Mixed        |
| Olive Tang et al. [61]               | America         | 2017 | DASH                                    | Higher intakes of vegetables, fruits or 18 grains and lower intake of fat or sweetened beverages                                                                                                                         | Plant-based  |
|                                      |                 |      | Typical American diet                   | Low in fruits, vegetables, and dairy products, with a fat content typical of the average diet in the United States.                                                                                                      | Mixed        |
| Stephen P. Juraschek et al. (2) [62] | America         | 2021 | DASH                                    | Higher intakes of vegetables, fruits or 18 grains and lower intake of fat or sweetened beverages                                                                                                                         | Plant-based  |
| M. Chatzipavlou et al. [66]          | Greece          | 2014 | Mediterranean Diet                      | High consumption of fruits, vegetables, legumes, olive oil, nuts, and whole grain; a moderate consumption of wine, dairy products, and poultry; and a low consumption of red meat, sweet beverages, creams, and pastries | Plant-based  |
| Yi-Tsen Tsai MS et al. [47]          | China<br>Taiwan | 2012 | Vegetable and fruit pattern             | Dark vegetables, White vegetables, Soy products, Fruit                                                                                                                                                                   | Plant-based  |
|                                      |                 |      | Uric acid-prone pattern                 | Seafood, Meat, Beverages, Organ meat                                                                                                                                                                                     | Animal-based |
| Ahmad Syauqy et al. [48]             | China<br>Taiwan | 2020 | Veggie–fruit–grains dietary pattern     | Dark- or light-colored vegetables, fruit, root crops, vegetables in oil/dressing, whole grains, rice/flour products, and legumes/soy products.                                                                           | Plant-based  |
|                                      |                 |      | Meat–seafood–eggs dietary pattern       | Meat, seafood, organ meats, and eggs                                                                                                                                                                                     | Animal-based |
|                                      |                 |      | Processed food–sweets dietary pattern   | Processed food, deep-fried food, sugary drinks, sauce, instant noodles, jam/honey, refined dessert, and fried rice/flour products                                                                                        | Mixed        |
|                                      |                 |      | Milk–dairy dietary pattern              | Milk and dairy products                                                                                                                                                                                                  | Mixed        |
| Meilin Zhang et al. (2) [17]         | China           | 2016 | High fruit and soybean products diet    | High in soybean products, fruits, vegetables and starchy tubers                                                                                                                                                          | Plant-based  |
| Xueying Wang et al. [57]             | China           | 2019 | Traditional model                       | High intake of cereals, meat, fruits and vegetables                                                                                                                                                                      | Mixed        |
|                                      |                 |      | Fried and smoked food and dessert model | High intake of fried, cured, smoked foods and desserts                                                                                                                                                                   | Mixed        |
|                                      |                 |      | High quality protein model              | High intake of milk, eggs, beans                                                                                                                                                                                         | Mixed        |
| Tingting Li et al. [19]              | China           | 2022 | Meat-based                              | High intake of animal organ meats, seafood, fresh                                                                                                                                                                        | Animal-based |

|                                       |         |      |                                 |                                                                                                                                                                                                                          |              |
|---------------------------------------|---------|------|---------------------------------|--------------------------------------------------------------------------------------------------------------------------------------------------------------------------------------------------------------------------|--------------|
|                                       |         |      |                                 | meat, and eggs                                                                                                                                                                                                           |              |
|                                       |         |      | Plant-based                     | Intake of mushroom algae, beans, and their products, nuts, and fruits                                                                                                                                                    | Mixed        |
|                                       |         |      | Local special                   | Intake of marinated smoked meat and grease                                                                                                                                                                               | Animal-based |
| Tingxin Li et al. [55]                | China   | 2022 | Animal-based and processed food | Refined rice and noodle, meat, aquatic products                                                                                                                                                                          | Mixed        |
|                                       |         |      | Traditional                     | Whole grains, vegetables, legume products                                                                                                                                                                                | Plant-based  |
|                                       |         |      | Ovo-lacto vegetarian            | Dairy products, fruits, eggs                                                                                                                                                                                             | Plant-based  |
| Jiaqi Nie et al. [56]                 | America | 2022 | HEI                             | Total fruit, whole fruit, total vegetables , dark green and orange vegetables and legumes, total grains, whole grains), milk , meat and beans, and oils.                                                                 | Plant-based  |
| Kangqi Yi et al. [38]                 | China   | 2022 | DASH                            | Higher intakes of vegetables, fruits or 18 grains and lower intake of fat or sweetened beverages                                                                                                                         | Plant-based  |
| Tanya J Major et al. [43]             | America | 2018 | DASH                            | Higher intakes of vegetables, fruits or 18 grains and lower intake of fat or sweetened beverages                                                                                                                         | Plant-based  |
|                                       |         |      | Mediterranean diet              | High consumption of fruits, vegetables, legumes, olive oil, nuts, and whole grain; a moderate consumption of wine, dairy products, and poultry; and a low consumption of red meat, sweet beverages, creams, and pastries | Plant-based  |
| Ioanna Panagiota Kalafati et al. [40] | Greek   | 2018 | Fast-food type                  | Fast-food main dishes, Sugar-sweetened soft drinks, Fried potatoes, Savory and puff pastry snacks, Red meat, Potatoes                                                                                                    | Mixed        |
|                                       |         |      | Prudent                         | Olive oil-based cooked vegetables, Legumes, Potatoes ,Fruits & Vegetables · Fatty fish                                                                                                                                   | Plant-based  |
|                                       |         |      | High Protein                    | Poultry, Eggs, Red meat                                                                                                                                                                                                  | Animal-based |
|                                       |         |      | Unsaturated FA                  | Nuts, Chocolate, Foods rich in unsaturated FA                                                                                                                                                                            | Mixed        |
| Luisa Lampignano et al. [44]          | Italy   | 2021 | Mediterranean diet              | High consumption of fruits, vegetables, legumes, olive oil, nuts, and whole grain; a moderate consumption of wine, dairy products, and poultry; and a low consumption of red meat, sweet beverages, creams, and pastries | Plant-based  |
| Giana Zarbato Longo et al. [45]       | Brazil  | 2022 | Western                         | Hamburgers and cheese sandwiches, Soft drinks, Pizza/pasta, Stroganoff, Chocolate, Processed meat,                                                                                                                       | Mixed        |

|                                |         |      |                           |                                                                                                                                                                                                                          |              |
|--------------------------------|---------|------|---------------------------|--------------------------------------------------------------------------------------------------------------------------------------------------------------------------------------------------------------------------|--------------|
|                                |         |      |                           | Sweets                                                                                                                                                                                                                   |              |
|                                |         |      | Snacks and processed food | Olive oil and other oils, Cheeses and cream cheese, Natural spices, Processed foods, Snacks (toasted), Snacks (toasted)                                                                                                  | Mixed        |
|                                |         |      | Healthy                   | Fruits, Breakfast cereals, Vegetables, Natural fruit juice, Yogurt and fermented milk                                                                                                                                    | Plant-based  |
|                                |         |      | Traditional brazilian     | Rice and roots, Beans, Caffeinated beverages, Meats (red and pork)                                                                                                                                                       | Mixed        |
| Judith Heindel et al. [46]     | Germany | 2020 | DASH                      | Higher intakes of vegetables, fruits or 18 grains and lower intake of fat or sweetened beverages                                                                                                                         | Plant-based  |
|                                |         |      | Mediterranean diet        | High consumption of fruits, vegetables, legumes, olive oil, nuts, and whole grain; a moderate consumption of wine, dairy products, and poultry; and a low consumption of red meat, sweet beverages, creams, and pastries | Plant-based  |
|                                |         |      | German Food Pyramid Index | High intake of beverages, fruits, and vegetables. Low intake of cereal products, dairy products, meat, fats/oils, and sweet intake                                                                                       | Plant-based  |
| Linda Hagfors et al. [65]      | Sweden  | 2003 | Mediterranean Diet        | High consumption of fruits, vegetables, legumes, olive oil, nuts, and whole grain; a moderate consumption of wine, dairy products, and poultry; and a low consumption of red meat, sweet beverages, creams, and pastries | Plant-based  |
| Mariane He´roux et al. [39]    | America | 2010 | Unhealthy Eating Index    | Processed and red meat, white potato products, nonwhole grains, added fat and reduced consumption of non-citrus fruits                                                                                                   | Animal-based |
| Christin Heidemann et al. [49] | Germany | 2011 | Processed foods pattern   | High intake of refined grains, processed meat, red meat, high-sugar beverages, eggs, potatoes, beer, sweets and cakes, snacks and butter                                                                                 | Mixed        |
|                                |         |      | Health-conscious pattern  | High intake of vegetables, vegetable oils, legumes, fruits, fish and whole grains                                                                                                                                        | Plant-based  |
| Roseline Yap WK et al. [22]    | Malay   | 2012 | Vegetables diet           | Various types of vegetables and fruits such as cabbage, cauliflower, broccoli, non-leafy, root and green leafy vegetables                                                                                                | Plant-based  |



|                                      |            |      |                                       |                                                                                                                                                                                                                          |              |
|--------------------------------------|------------|------|---------------------------------------|--------------------------------------------------------------------------------------------------------------------------------------------------------------------------------------------------------------------------|--------------|
| Pilar Guallar-Castillón et al. [50]  | Spain      | 2013 | Fruits diet                           | Grapes, canned fruits, fresh longan, lychee, apple, orange and pear respectively                                                                                                                                         | Plant-based  |
|                                      |            |      | Animal protein and rice diet          | Fish, shrimp, chicken egg and rice                                                                                                                                                                                       | Animal-based |
|                                      |            |      | Fast food and preserved foods diet    | Various types of meat burgers, chicken nuggets, cheese and canned fish                                                                                                                                                   | Animal-based |
|                                      |            |      | Southern European Atlantic Diet score | Fresh fish, cod, red meat and pork products, dairy products, legumes and vegetables, vegetable soup, potatoes, whole-grain bread, and wine                                                                               | Mixed        |
| Maja Ortner Hadziabdi et al. [63]    | Croatia    | 2016 | Mediterranean diet                    | High consumption of fruits, vegetables, legumes, olive oil, nuts, and whole grain; a moderate consumption of wine, dairy products, and poultry; and a low consumption of red meat, sweet beverages, creams, and pastries | Plant-based  |
|                                      |            |      | Mediterranean diet                    | High consumption of fruits, vegetables, legumes, olive oil, nuts, and whole grain; a moderate consumption of wine, dairy products, and poultry; and a low consumption of red meat, sweet beverages, creams, and pastries | Plant-based  |
|                                      |            |      | Standard hypolipemic diet             | High consumption of fruits, vegetables, legumes, and whole grain; a moderate consumption of wine, dairy products, and poultry; and a low consumption of red meat, sweet beverages, creams, and pastries                  | Mixed        |
| Stephen P. Juraschek et al. (3) [64] | America    | 2018 | DASH                                  | Higher intakes of vegetables, fruits or 18 grains and lower intake of fat or sweetened beverages                                                                                                                         | Plant-based  |
| Farhad Vahid et al. [58]             | Luxembourg | 2023 | AHEI                                  | Total fruit, whole fruit, total vegetables, dark green and orange vegetables and legumes, total grains, whole grains), milk, meat and beans, and oils.                                                                   | Plant-based  |
|                                      |            |      | Mediterranean diet                    | High consumption of fruits, vegetables, legumes, olive oil, nuts, and whole grain; a moderate consumption of wine, dairy products, and poultry; and a low consumption of red meat, sweet beverages, creams, and pastries | Plant-based  |
|                                      |            |      | DASH                                  | Higher intakes of vegetables, fruits or 18 grains and lower intake of fat or sweetened beverages                                                                                                                         | Plant-based  |

|                                   |        |      |                         |                                                                                                                                                                            |              |
|-----------------------------------|--------|------|-------------------------|----------------------------------------------------------------------------------------------------------------------------------------------------------------------------|--------------|
| Sergey A. Maksimov et al.<br>[59] | Russia | 2020 | ‘Smart’ dietary pattern | Dairy products (milk, kefir, yogurt, sour cream, cream, cottage cheese, cheese), Sweets and pastries (candies, jams, cookies, etc.), Fruits and vegetables, Cereals, pasta | Plant-based  |
|                                   |        |      | ‘Salty’ dietary pattern | Sausages, frankfurters, offal (tongue, liver, heart, etc.), Pickled and marinated foods                                                                                    | Animal-based |
|                                   |        |      | ‘Meat’ dietary pattern  | Meat (beef, pork, lamb, etc.), Fish and seafood, Poultry (chicken, turkey, etc.)                                                                                           | Animal-based |
|                                   |        |      | ‘Mixed’ dietary pattern | Legumes (beans, lentils, peas, etc.), Pickled and marinated foods, Fish and seafood                                                                                        | Mixed        |

Abbreviation: RRR: Reduced Rank Regression; PLS: Partial Least Squares Regression; DASH: Dietary Approaches to Stop Hypertension; HEI-2015: the Healthy Eating Index 2015; FA: Fatty Acids.

**Table S3** Quality assessment: cross-sectional studies.

| First author, published year            | Selection (Max = 4*) | Comparability (Max = 2*) | Outcome (Max = 3*) |
|-----------------------------------------|----------------------|--------------------------|--------------------|
| Jiaqi Nie et al. 2022[56]               | ****                 | **                       | ***                |
| Kontogianni, M. D et al. 2012[42]       | ***                  | **                       | **                 |
| Christina Chrysohoou et al. 2011[41]    | ***                  | **                       | ***                |
| Tanya J Major et al. 2018[43]           | ***                  | *                        | **                 |
| Luisa Lampignano et al. 2021[44]        | ***                  | **                       | **                 |
| Ahmad Syauqy et al. 2021[48]            | ****                 | **                       | *                  |
| Giana Zarbato Longo et al. 2022[45]     | ***                  | **                       | **                 |
| Judith Heindel et al. 2020[46]          | ***                  | **                       | ***                |
| Yi-Tsen Tsai MS et al. 2012[47]         | ***                  | **                       | **                 |
| Christin Heidemann et al. 2011[49]      | ***                  | **                       | **                 |
| Roseline Yap WK et al. 2012[22]         | ***                  | **                       | **                 |
| Pilar Guallar-Castillón et al. 2013[50] | ***                  | **                       | ***                |
| Meiqi Zhou et al. 2022 [8]              | ***                  | **                       | **                 |
| Marta Guasch-Ferré et al. 2013[15]      | ****                 | **                       | *                  |
| Yuxiang Yang et al. 2022[51]            | ***                  | **                       | **                 |
| Xirun Liu et al. (1) 2020[21]           | ***                  | **                       | ***                |
| Xirun Liu et al. (2) 2018[52]           | ***                  | **                       | ***                |
| Shaokai Lin et al. 2018[9]              | ***                  | **                       | ***                |
| Fang He et al. 2017[53]                 | ***                  | **                       | **                 |
| Yun Gao et al. 2021[54]                 | ***                  | *                        | ***                |
| Xueying Wang et al. 2019[57]            | ***                  | **                       | **                 |

|                                    |     |    |     |
|------------------------------------|-----|----|-----|
| Tingting Li et al. 2022[19]        | *** | ** | **  |
| Tingxin Li et al. 2022[55]         | *** | *  | **  |
| Farhad Vahid et al. 2023[58]       | *** | ** | **  |
| Sergey A. Maksimov et al. 2020[59] | *** | ** | *** |

---

**Table S4** Quality assessment: cohort studies and case-control studies.

| First author, published year              | Selection | Comparability | Outcome |
|-------------------------------------------|-----------|---------------|---------|
| Zumin Shi et al. 2020[37]                 | ****      | **            | ***     |
| Tingjing Zhang et al. 2022[36]            | ****      | **            | ***     |
| Kangqi Yi et al. 2022[38]                 | ****      | **            | ***     |
| Mariane He´roux et al. 2010[39]           | ****      | *             | ***     |
| Meilin Zhang et al. (1) 2012[20]          | ****      | **            | ***     |
| Ioanna Panagiota Kalafati et al. 2018[40] | ****      | *             | ***     |
| Yang Xia et al.2018[18]                   | ****      | **            | ***     |

**Table S5** Subgroup analysis for the association between dietary patterns and hyperuricemia.

| Dietary patterns                     | Study characteristic                      | Categories            | Effect size | <i>I</i> <sup>2</sup> (%) | Odds ratio   | 95% CI       | P     |
|--------------------------------------|-------------------------------------------|-----------------------|-------------|---------------------------|--------------|--------------|-------|
| Plant-based dietary pattern (n= 22)  | Pooled effect size                        | /                     | 22          | 93.0                      | 0.75         | (0.68, 0.83) | 0.000 |
|                                      | Sample size                               | n ≤ 2000              | 9           | 77.1                      | 0.75         | (0.58, 0.98) | 0.000 |
|                                      |                                           | n > 2000              | 13          | 95.6                      | 0.74         | (0.66, 0.85) | 0.000 |
|                                      | Study design                              | Cross-sectional study | 18          | 94.2                      | 0.75         | (0.66, 0.85) | 0.000 |
|                                      |                                           | Cohort study          | 2           | 0.0                       | 0.80         | (0.74, 0.87) | 0.580 |
|                                      |                                           | Case-control study    | 2           | 91.2                      | 0.52         | (0.17, 1.58) | 0.001 |
|                                      | Methods used to identify dietary patterns | Posteriori            | 17          | 91.9                      | 0.75         | (0.63, 0.88) | 0.000 |
|                                      |                                           | Priori                | 5           | 92.6                      | 0.78         | (0.66, 0.91) | 0.000 |
|                                      | Location                                  | China                 | 18          | 91.2                      | 0.74         | (0.64, 0.86) | 0.000 |
|                                      |                                           | The other regions     | 4           | 54.2                      | 0.85         | (0.78, 0.92) | 0.088 |
| Animal-based dietary pattern (n= 16) | Pooled effect size                        | /                     | 16          | 87.6                      | 1.36         | (1.21, 1.54) | 0.000 |
|                                      | Sample size                               | n ≤ 2000              | 6           | 14.0                      | 1.31         | (1.13, 1.52) | 0.325 |
|                                      |                                           | n > 2000              | 10          | 92.7                      | 1.39         | (1.16, 1.66) | 0.000 |
|                                      | Study design                              | Cross-sectional study | 12          | 91.0                      | 1.37         | (1.15, 1.65) | 0.000 |
|                                      |                                           | Cohort study          | 1           | /                         | 1.24         | (1.13, 1.37) | /     |
| Case-control study                   |                                           | 3                     | 0.0         | 1.53                      | (1.25, 1.87) | 0.386        |       |
| Mixed dietary pattern (n= 22)        | Pooled effect size                        | /                     | 22          | 86.3                      | 1.16         | (1.01, 1.32) | 0.000 |
|                                      | Sample size                               | n ≤ 2000              | 11          | 68.5                      | 1.22         | (0.99, 1.51) | 0.000 |
|                                      |                                           | n > 2000              | 11          | 91.7                      | 1.12         | (0.94, 1.33) | 0.000 |

|              |                       |    |      |      |              |       |
|--------------|-----------------------|----|------|------|--------------|-------|
| Study design | Cross-sectional study | 18 | 64.1 | 1.06 | (0.95, 1.18) | 0.000 |
|              | Cohort study          | 3  | 97.2 | 1.65 | (0.91, 2.99) | 0.000 |
|              | Case-control study    | 1  | /    | 1.10 | (0.89, 1.36) | /     |

---

**Table S6.** Publication bias of included articles.

| Dietary patterns             | Categories          | Publication bias |
|------------------------------|---------------------|------------------|
| Plant-based dietary pattern  | Hyperuricemia       | P = 0.028        |
|                              | SUA-mean difference | P = 0.958        |
|                              | SUA-coefficient     | P = 0.000        |
| Animal-based dietary pattern | Hyperuricemia       | P = 0.402        |
|                              | SUA-mean difference | P = 0.879        |
|                              | SUA-coefficient     | P = 0.372        |
| Mixed dietary pattern        | Hyperuricemia       | P = 0.928        |
|                              | SUA-mean difference | P = 0.885        |
|                              | SUA-coefficient     | P = 0.517        |



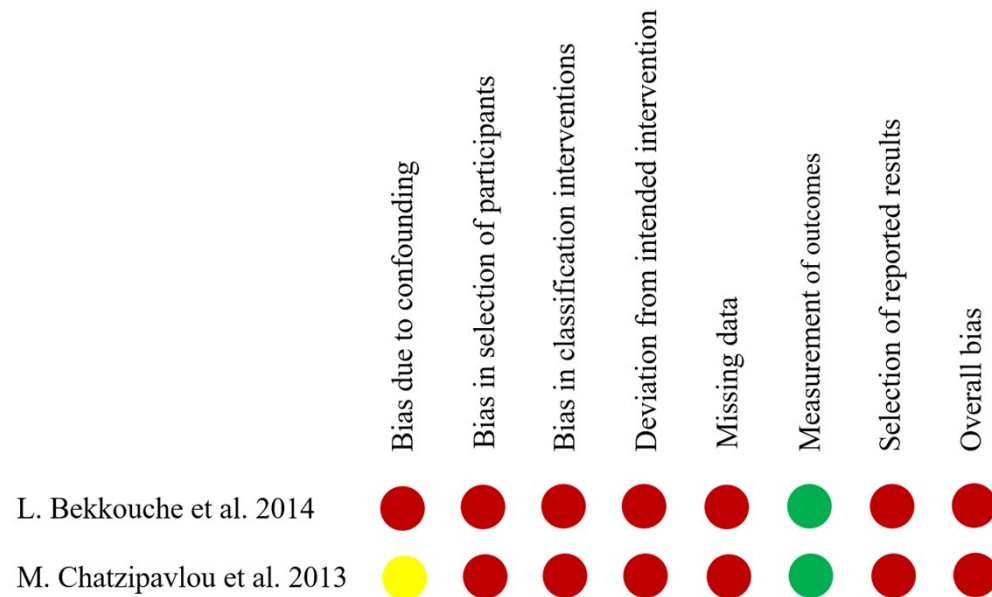

**Figure S1** Assessment risk of bias of non-randomized studies included in this review according to the Risk of Bias in Non-randomized Studies-of Interventions (ROBINS-I) assessment tool. Red: high/critical risk, yellow: moderate risk, green: low risk, grey: no information or unclear risk.

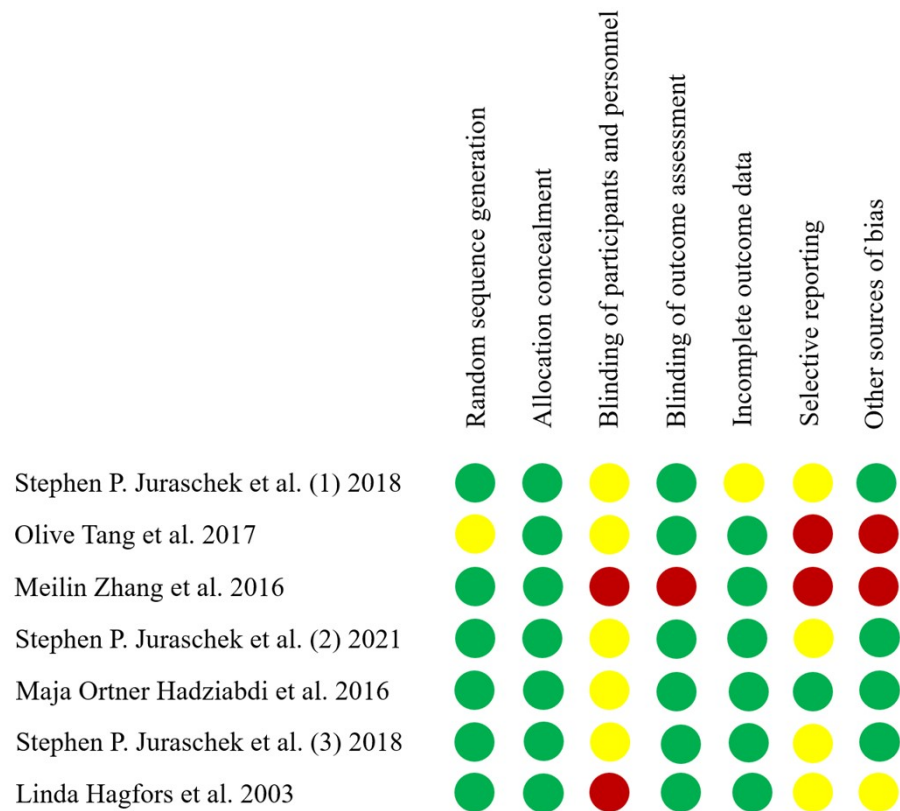

**Figure S2** Assessment risk of bias of randomized controlled trials included in this review according to the Cochrane Collaboration’s tool. Red: high risk, yellow: moderate risk, green: low risk, grey: no information or unclear risk.

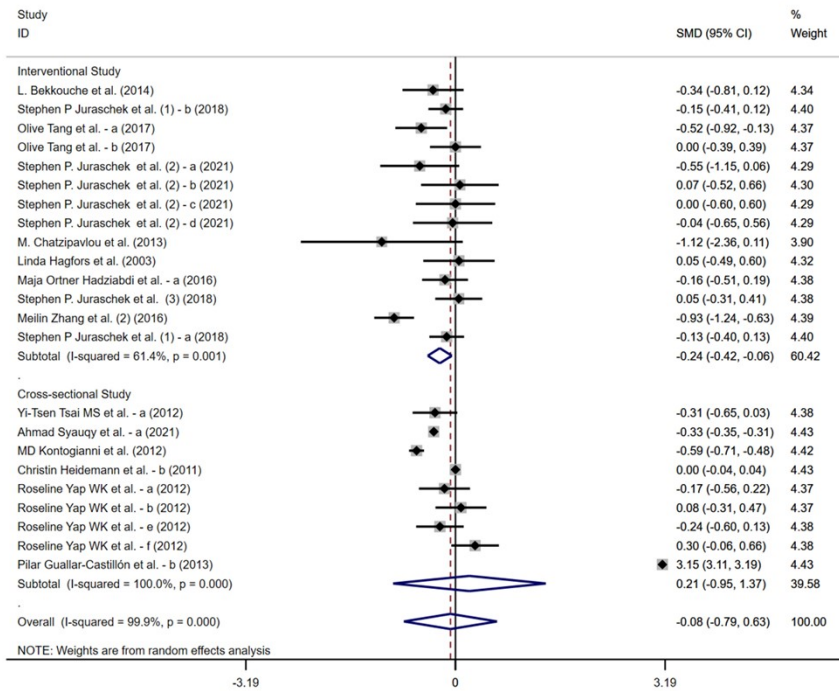

(A) The effect size is mean difference

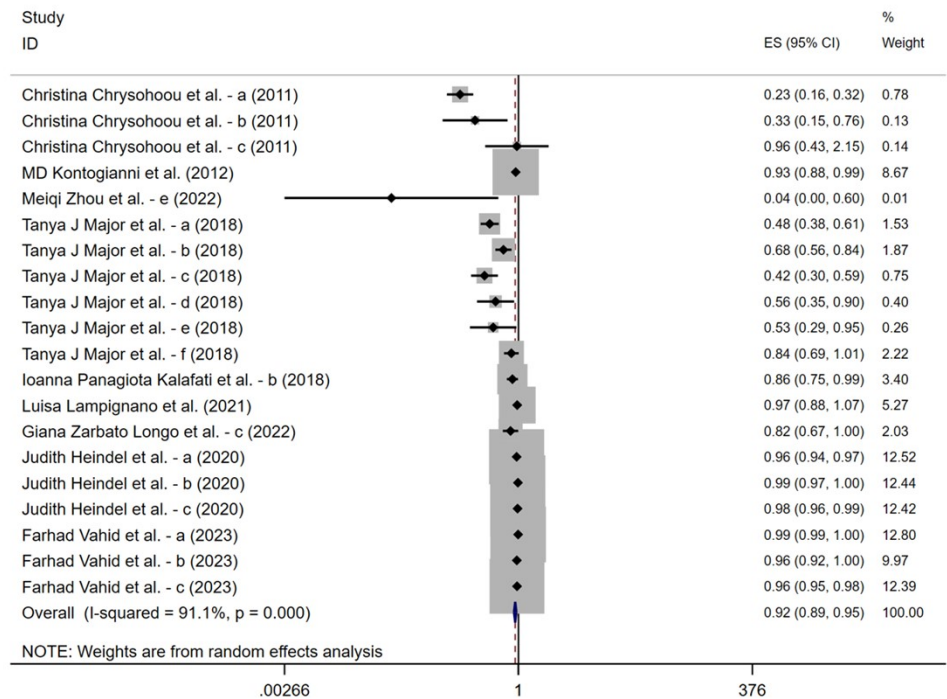

(B) The effect size is odds ratio

Figure S3 Forest plot of plant-based dietary pattern and SUA.

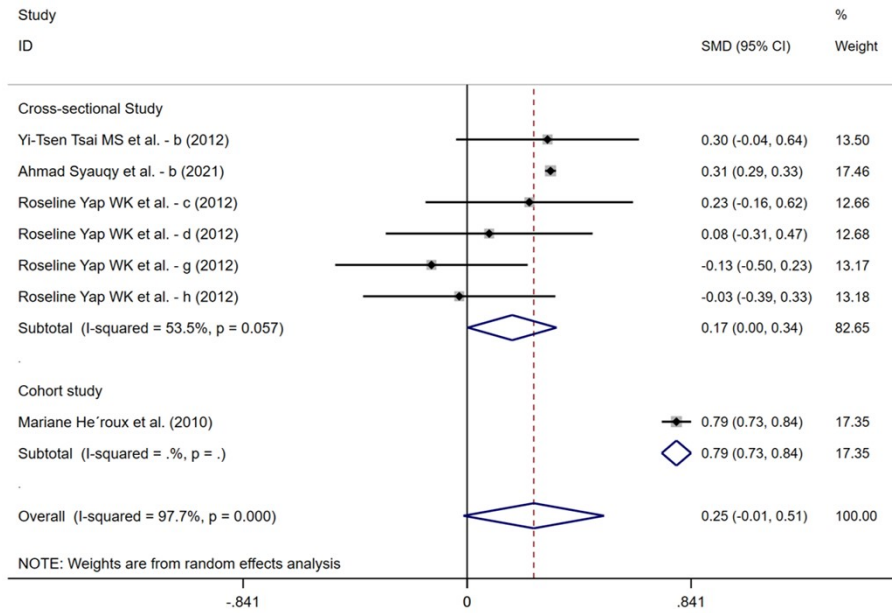

(A): The effect size is mean difference

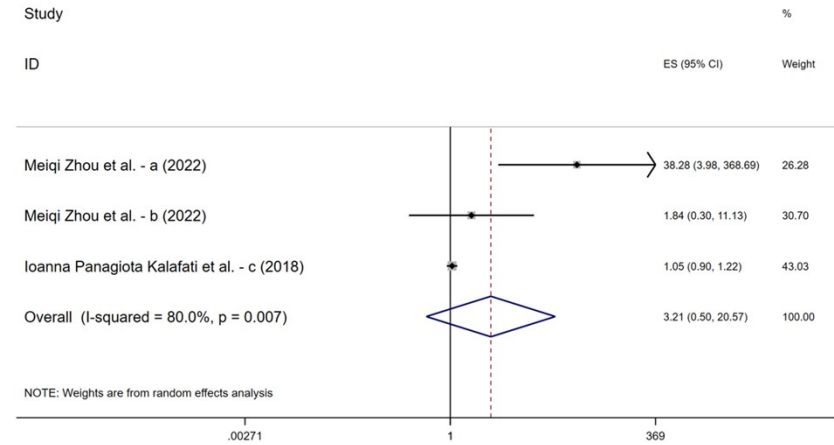

(B): The effect size is odds ratio

**Figure S4 Forest plot of animal-based dietary pattern and SUA.**

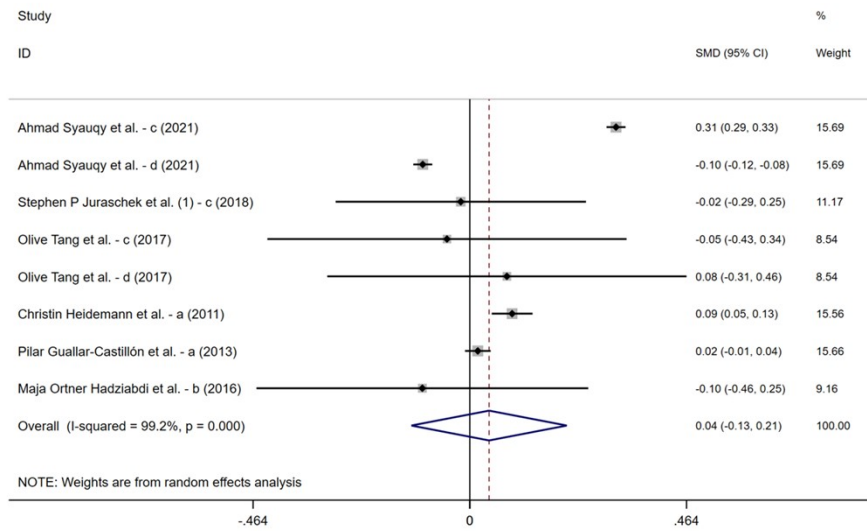

(A): The effect size is mean difference

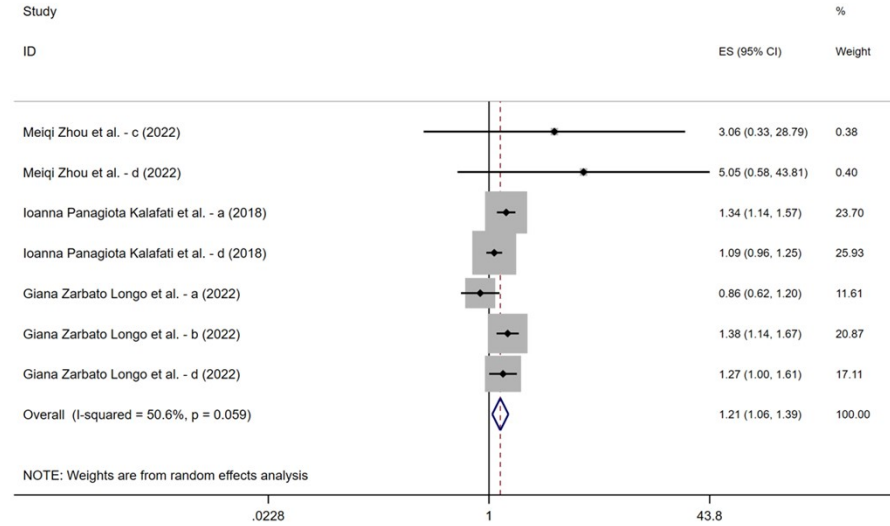

(B): The effect size is odds ratio

**Figure S5** Forest plot of mixed dietary pattern and SUA.

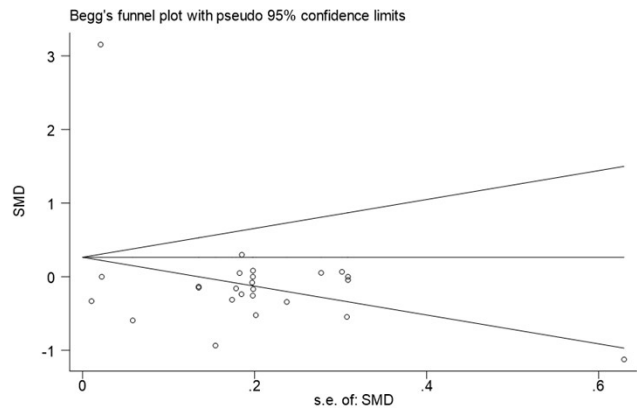

(A) Plant-based dietary pattern

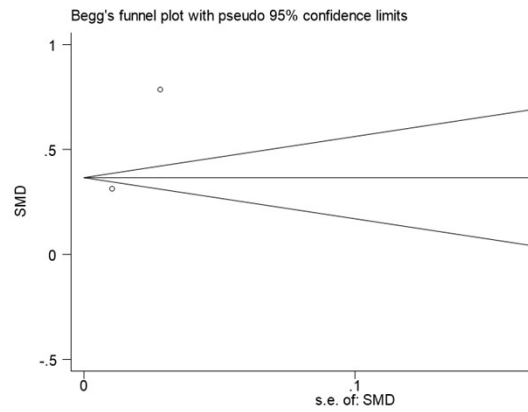

(B) Animal-based dietary pattern

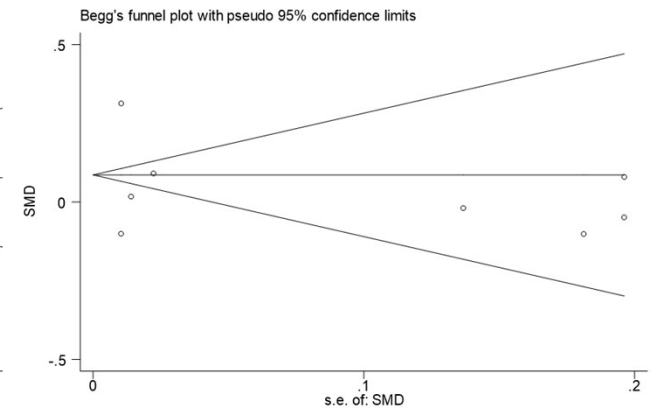

(C) Mixed dietary pattern

**Figure S6** Funnel plot for the association between animal-based dietary pattern and SUA (effect value: mean difference) .

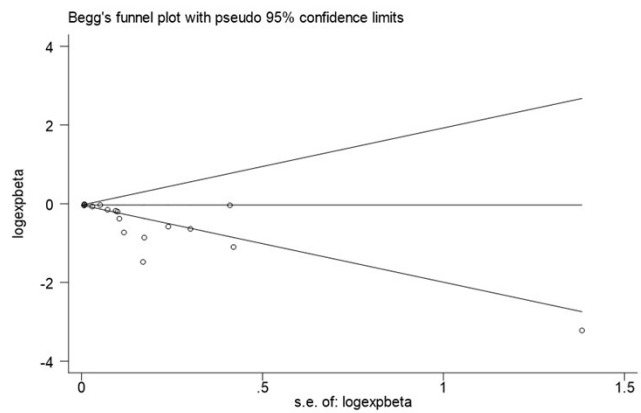

(A) Plant-based dietary pattern

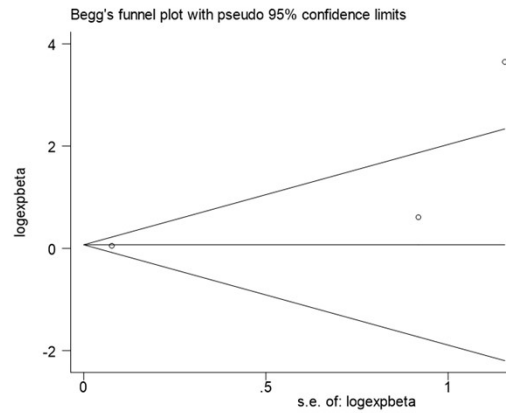

(B) Animal-based dietary pattern

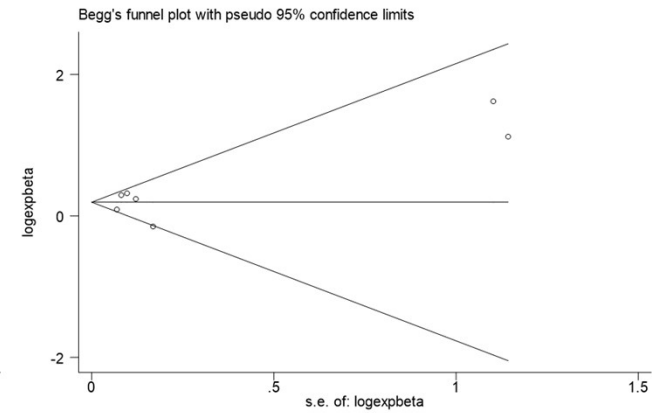

(C) Mixed dietary pattern

**Figure S7** Funnel plot for the association between dietary patterns and SUA (effect value: coefficient).

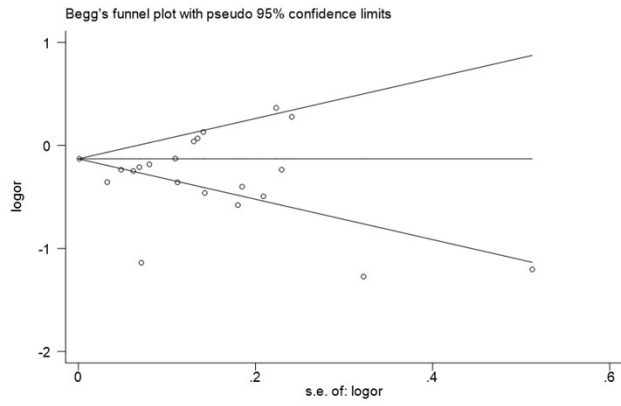

(A) Plant-based dietary pattern

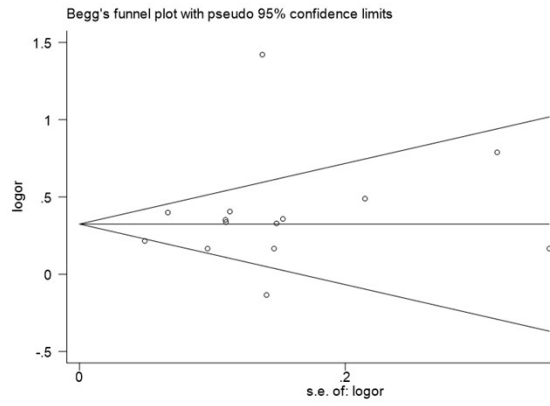

(B) Animal-based dietary pattern

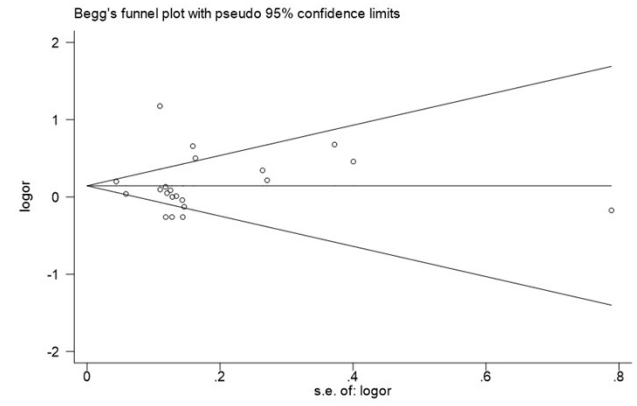

(C) Mixed dietary pattern

**Figure S8** Funnel plot for the association between dietary patterns and hyperuricemia (effect value: odds ratio).



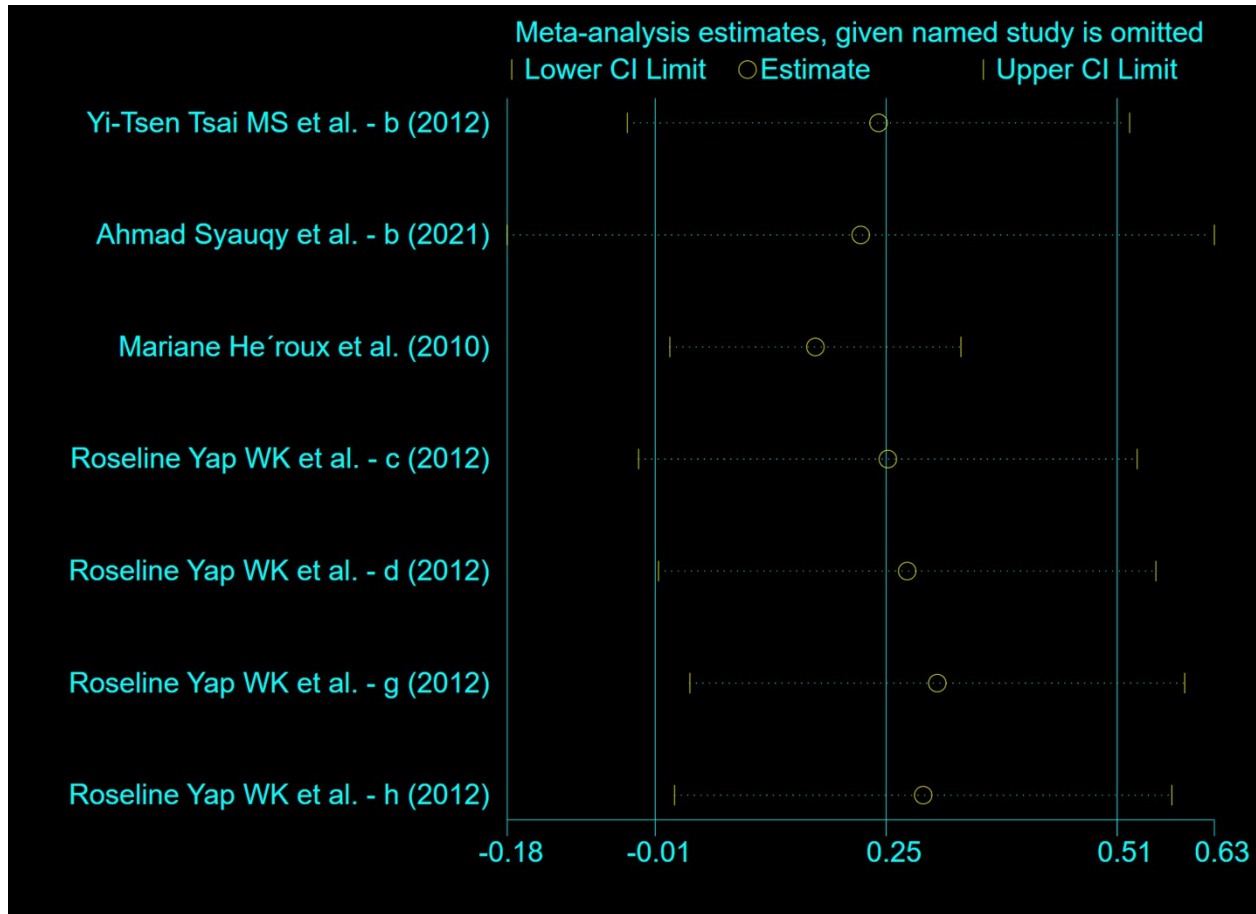

**Figure S9** Influence analysis for the association between animal-based dietary pattern and SUA (effect value: mean difference).

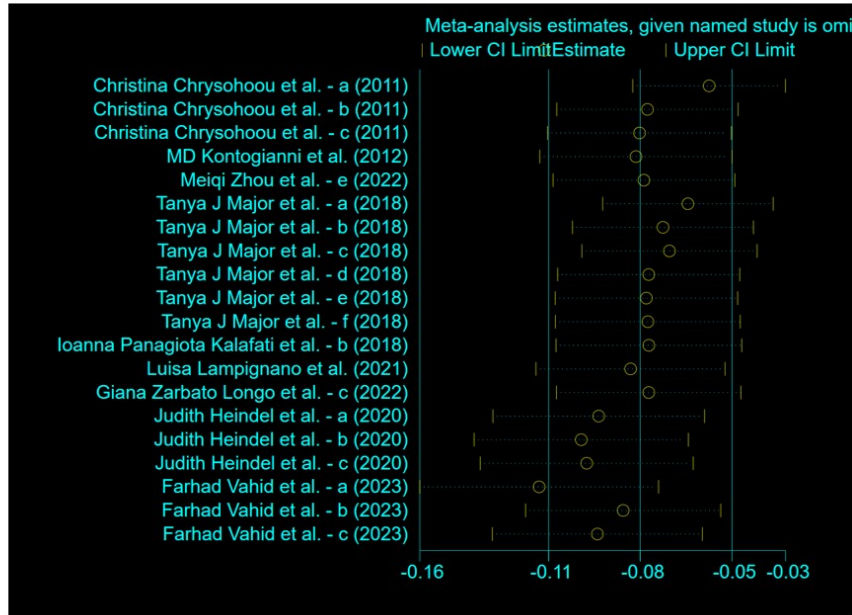

(A) Plant-based dietary pattern with SUA.

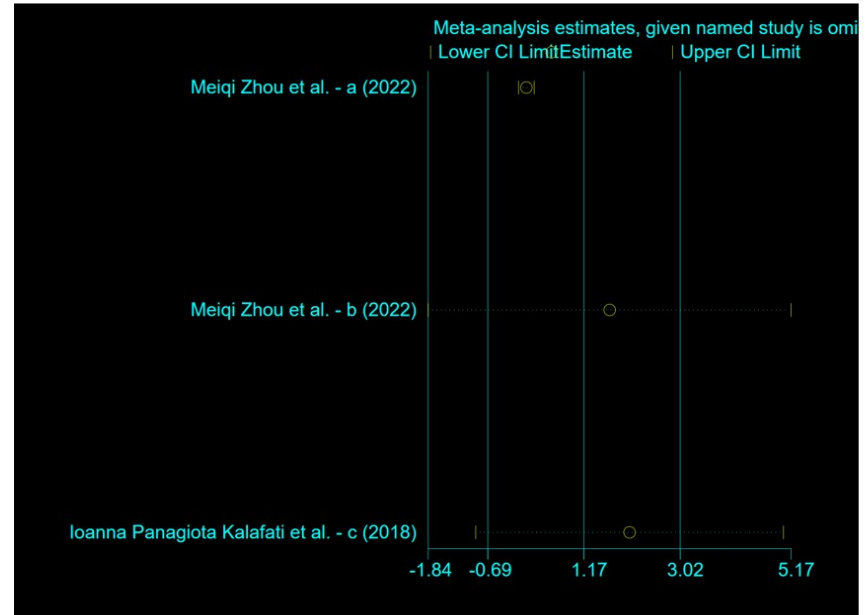

(B) Animal-based dietary pattern with SUA.

**Figure S10** Influence analysis for the association between dietary patterns and SUA (effect value: odds ratio).

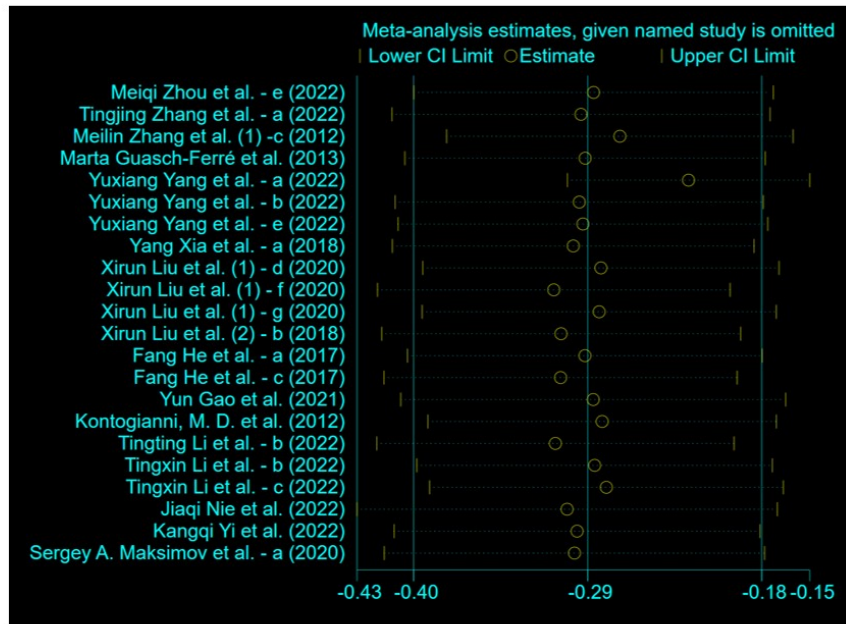

(A) Plant-based dietary pattern with hyperuricemia.

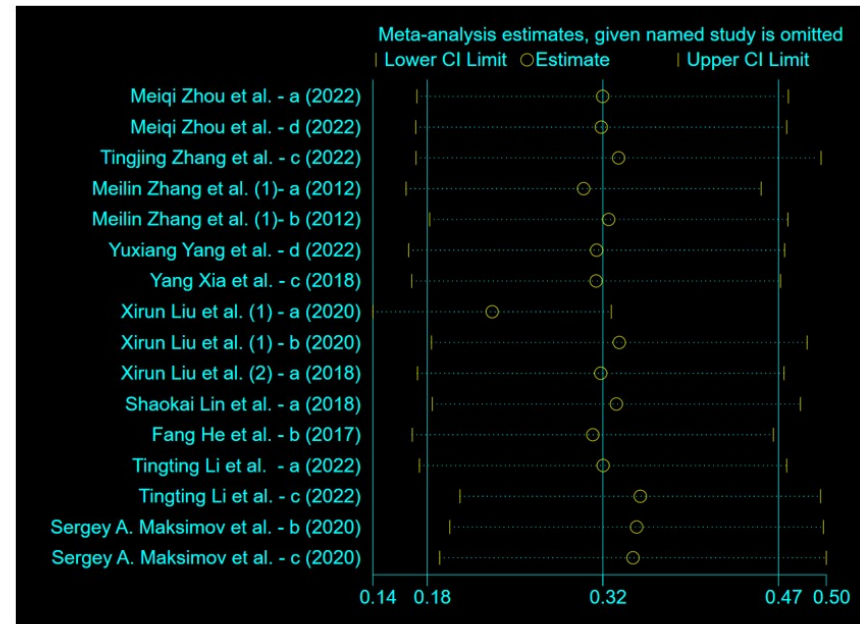

(B) Animal-based dietary pattern with hyperuricemia.

**Figure S11** Influence analysis for the association between dietary patterns and hyperuricemia (effect value: odds ratio).

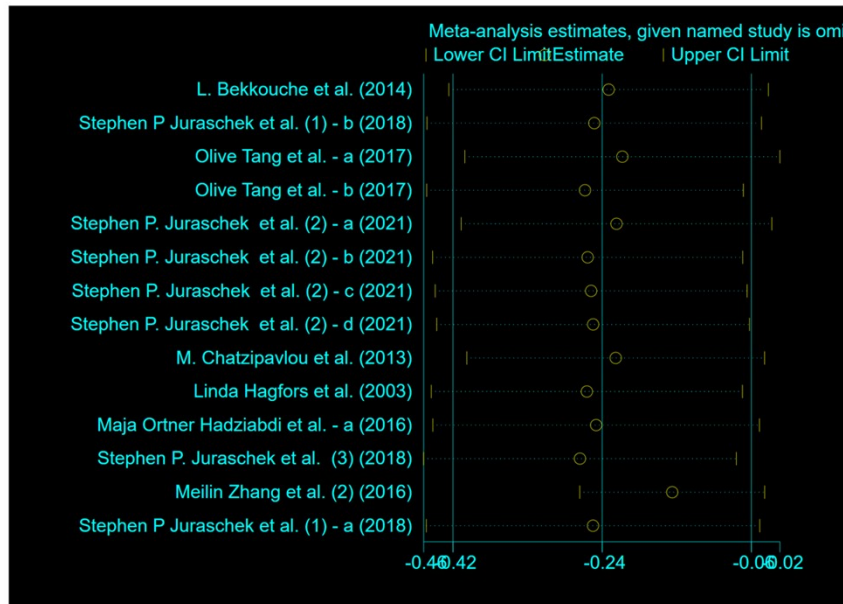

(A) Plant-based dietary pattern with SUA in interventional studies.

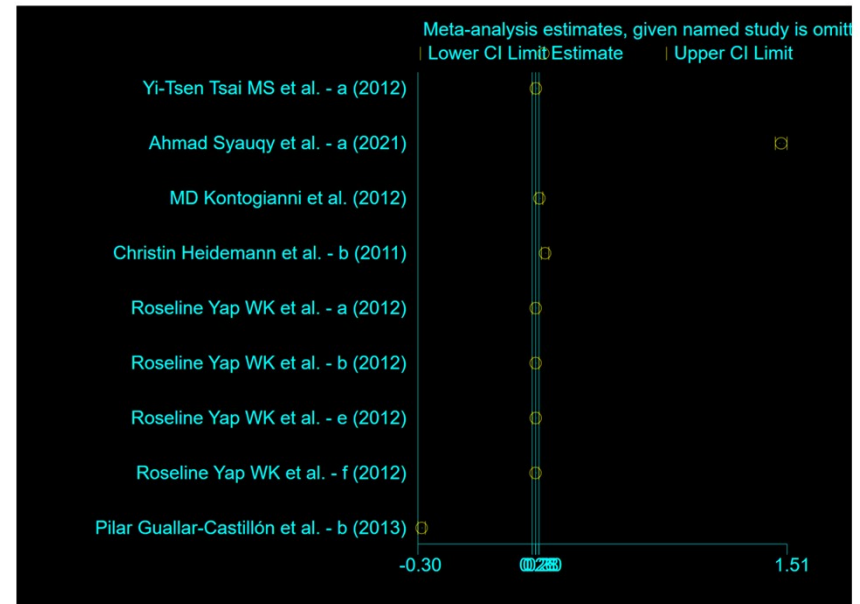

(B) Plant-based dietary pattern with SUA in cross-sectional studies.

**Figure S12** Influence analysis for the association between plant-based dietary pattern and SUA (effect value: mean difference).

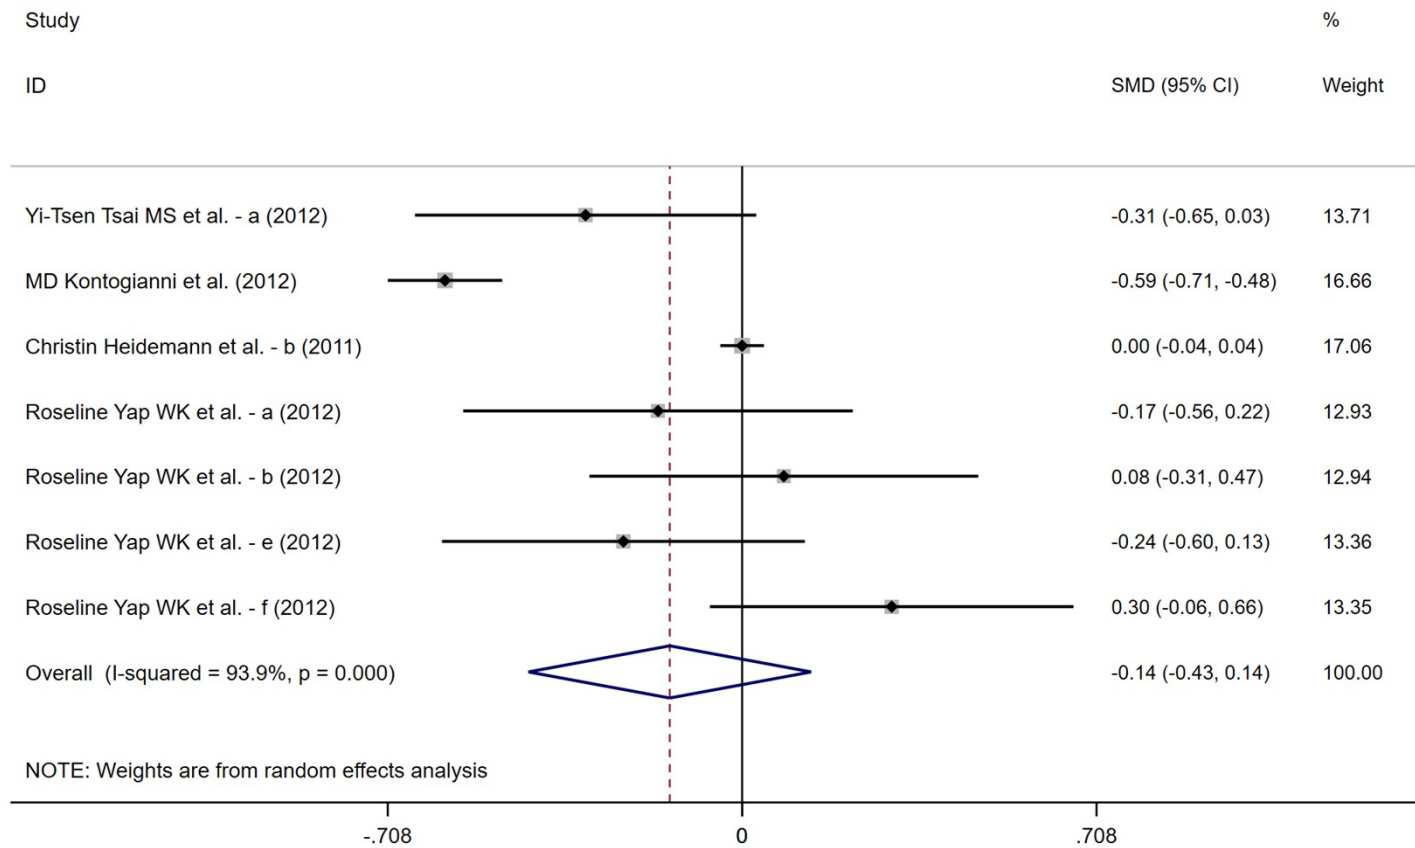

**Figure S13** Forest plot of plant-based dietary pattern and SUA in cross-sectional studies (excluded studies of Pilar Guallar-Castillón et al. and Ahmad Syauqy et al).
